# Supplementary material
Source: PubMed Central journal article supplement (PMC4104431)
Supplement: NIHMS588870-supplement-01.pdf [file NIHMS588870-supplement-01.pdf]

## **Bridged Cyclams as Imaging Agents for Chemokine Receptor 4 (CXCR4)**

Lauren E. Woodard\*, Ravindra A. De Silva\*, Babak Behnam Azad, Ala Lisok, Mrudula Pullambhatla, Wojciech Lesniak, Ronnie C. Mease, Martin G. Pomper, Sridhar Nimmagadda

Russell H. Morgan Department of Radiology and Radiological Science, Johns Hopkins University, Baltimore, Maryland, 21287

\* These authors equally contributed to this work.

**Supplementary Information**

## Methods:

**Synthesis of 2-nitro-*N*-(pyridin-2-ylmethyl)benzenesulfonamide (3)** A solution of 2-(amino methyl)pyridine (**1**, 2.0 g, 18.5 mmol) was added drop wise to a stirred solution of 2-nitrobenzenesulfonyl chloride (6.0 g, 27.1 mmol) and Et<sub>3</sub>N (3.7 g, 37.0 mmol) in dry CH<sub>2</sub>Cl<sub>2</sub> (60 mL) under a nitrogen atmosphere. The reaction mixture was stirred at room temperature for 3.5 h, and then quenched with water (50 mL). The aqueous layer was separated and extracted with EtOAc (5 X 50 mL). The combined organic layers were dried over MgSO<sub>4</sub> and evaporated to give a white solid which was collected by filtration and washed with cold CH<sub>2</sub>Cl<sub>2</sub> to give desired product **3** as a white solid in 74% yield. <sup>1</sup>H NMR (400 MHz, acetone-d<sub>6</sub>): δ 4.45 (s, 2H), 7.20 (dd, *J*<sub>1</sub> = 7.4 Hz, *J*<sub>2</sub> = 4.5 Hz, 1H), 7.40 (d, *J* = 7.7 Hz, 1H), 7.68 (ddd, *J*<sub>1</sub> = 7.7 Hz, *J*<sub>2</sub> = 7.4 Hz, *J*<sub>3</sub> = 1.6 Hz, 1H), 7.76 (t, *J* = 7.6 Hz, 1H), 7.82 (t, *J* = 7.6 Hz, 1H), 7.94 (dd, *J*<sub>1</sub> = 7.7 Hz, *J*<sub>2</sub> = 1.5 Hz, 1H), 8.05 (dd, *J*<sub>1</sub> = 7.5 Hz, *J*<sub>2</sub> = 1.7 Hz, 1H), 8.38 (d, *J* = 4.6 Hz, 1H); <sup>13</sup>C NMR (100 MHz, acetone-d<sub>6</sub>): δ 48.09, 121.62, 121.68, 122.43, 124.96, 132.64, 133.51, 133.57, 136.57, 148.84, 148.93, 155.91; ESI-MS *m/z*: 294.0 [M<sup>+</sup>1].

**Synthesis of 2-nitro-*N*-(pyrimidin-2-ylmethyl)benzenesulfonamide (4)** A mixture of 2-pyrimidinemethaneamine (**2**, 0.1g, 0.916 mmol), 2-nitrobenzene sulfonylchloride (0.31 g, 0.137 mmol) and Et<sub>3</sub>N (0.18 g, 1.83 mmol) in dry CH<sub>3</sub>CN was stirred under N<sub>2</sub> for 4 h at room temperature, and then quenched with H<sub>2</sub>O. The aqueous layer was separated and extracted with EtOAc. The combined organic layer was dried over MgSO<sub>4</sub> and evaporated to small volume. The crude product was purified by column chromatography on silica gel (10% MeOH/CH<sub>2</sub>Cl<sub>2</sub> with 0.1% Et<sub>3</sub>N) to give **4** as a white solid (0.134 g,

50% yield). **<sup>1</sup>H NMR** (400 MHz, acetone- $D_6$ ):  $\delta$  4.57 (s, 2H), 7.13 (s, 1H, NH), 7.28 (t,  $J = 4.8$  Hz, 1H), 7.79 (t,  $J = 9.2$  Hz, 1H), 7.85 (t,  $J = 8.0$  Hz, 1H), 7.95 (d,  $J = 8.0$  Hz, 1H), 8.02 (d,  $J = 8.0$  Hz, 1H), 8.86 (d,  $J = 4.6$  Hz, 1H); **ESI-MS**  $m/z$ : 295.07 [ $M^+1$ ].

**Synthesis of *N*-(4-(hydroxymethyl)benzyl)-2-nitro-*N*-(pyridin-2-ylmethyl) benzene sulfonamide (5)** A mixture of 2-nitro-*N*-(pyridin-2-ylmethyl) benzenesulfonamide **3** (0.3 g, 1 mmol), 4-bromo(methyl)benzyl alcohol (0.2g, 1 mmol), and  $K_2CO_3$  (0.28 g, 2 mmol) in dry  $CH_3CN$  (10 mL) was heated at 60°C for 4 h with stirring under atmospheric nitrogen. The reaction mixture was then allowed to cool down to room temperature, the solvent evaporated and the residue was partitioned between water and  $CH_2Cl_2$ . The separated aqueous layer was extracted with  $CH_2Cl_2$ . The combined organic extracts were dried over  $MgSO_4$  and concentrated in vacuo. The residue was suspended in hexane overnight and collected by filtration to get the desired product **5** in 78% yield (0.32 g) as a white solid. **<sup>1</sup>H NMR** (400 MHz,  $CDCl_3$ ):  $\delta$  1.78 (bs, 1H), 4.55 (s, 1H), 4.58 (s, 1H), 4.61 (s, 1H), 7.13-7.22 (m, 6H), 7.48-7.57 (m, 2H), 7.65-7.68 (m, 2H), 7.96 (d,  $J = 4.2$  Hz, 1H); **<sup>13</sup>C NMR** (100 MHz,  $CDCl_3$ ):  $\delta$  51.46, 52.12, 64.94, 122.38, 122.50, 124.22, 127.20, 128.85, 131.07, 131.63, 132.01, 133.34, 134.12, 134.56, 136.65, 140.62, 149.23, 155.77; **ESI-MS**  $m/z$ : 414.1 [ $M^+1$ ].

**Synthesis of *N*-(4-(hydroxymethyl)benzyl)-2-nitro-*N*-(pyrimidin-2-ylmethyl) benzene sulfonamide (6)** A mixture of 2-nitro-*N*-(pyrimidin-2-ylmethyl)benzenesulfonamide **4** (0.3 g, 1 mmol), 4-bromo(methyl)benzyl alcohol (0.2 g, 1 mmol), and  $K_2CO_3$  (0.28 g, 2 mmol) in dry  $CH_3CN$  (10 mL) was heated at 60°C for 4 h with stirring under nitrogen.

The reaction mixture was then allowed to cool down to room temperature, the solvent was evaporated and the residue partitioned between water and CH<sub>2</sub>Cl<sub>2</sub>. The separated aqueous layer was extracted with CH<sub>2</sub>Cl<sub>2</sub>. The combined organic extracts were dried over MgSO<sub>4</sub>, concentrated in vacuo, and purified by column chromatography on silica gel (10% MeOH/CH<sub>2</sub>Cl<sub>2</sub> with 0.1% Et<sub>3</sub>N) to give **6** as a white solid (47% yield). <sup>1</sup>H NMR (400 MHz, acetone-d<sub>6</sub>): δ 4.55 (s, 2H), 4.59 (s, 2H), 4.73 (s, 2H), 7.15 (d, *J* = 7.7 Hz, 2H), 7.25-7.21 (m, 3H), 7.81-7.69 (m, 3H), 8.09 (d, *J* = 7.7 Hz, 1H), 8.52 (d, *J* = 4.6 Hz, 1H); ESI-MS *m/z*: 414.0 [M<sup>+</sup>1].

**Synthesis of *N*-(4-(chloromethyl)benzyl)-2-nitro-*N*-(pyridin-2-ylmethyl) benzene sulfonamide (7)** To a mixture of **5** (0.1 g, 0.24 mmol) and Et<sub>3</sub>N (0.12 mL, 0.72 mmol) in dry CH<sub>2</sub>Cl<sub>2</sub> (5 mL) cooled in an ice bath under nitrogen atmosphere was added methanesulfonylchloride (0.045 mL, 0.58 mmol), and the reaction mixture was heated to reflux for 6 h. The solution was cooled down to room temperature, diluted with CH<sub>2</sub>Cl<sub>2</sub> and washed with aqueous NaHCO<sub>3</sub> and H<sub>2</sub>O then dried over MgSO<sub>4</sub> and concentrated in vacuo to give **7** as an orange oil (0.1 g, 98% yield). **7** was used without further purification. <sup>1</sup>H NMR (400 MHz, CDCl<sub>3</sub>): δ 4.48 (s, 2H), 4.52-4.54 (two singles closely overlap, 4H), 7.12-7.27 (m, 6H), 7.55 (m, 2H), 7.66 (d, *J* = 4.0 Hz, 2H), 7.92 (d, *J* = 8.0 Hz, 1H), 8.39 (d, *J* = 3.9 Hz, 1H); ESI-MS *m/z*: 432.0 [M<sup>+</sup>1].

Compound **8** was synthesized using the same general procedure as compound **7**. The identity of compound **8** was verified using mass spectrometry (exact mass: 432.07, observed mass (M+H): 432.84), and was subsequently used without further purification.

**Synthesis of 1,4,8,11-tetraazabicyclo[10.2.2]hexadecane (17)** DIBAL-H in hexanes (20 mL, 20 mmol) was added drop wise to *cis*-glyoxal cyclam (**16**, 0.15 g, 0.67 mmol) at 0°C. The reaction mixture was stirred and allowed to come back to room temperature over an hour. The hexanes were removed on a rotary evaporator and replaced with 10 mL of toluene. The solution was refluxed for 10 days before workup at 0°C with benzene, sodium fluoride and water. The mixture was filtered and washed with ethanol to yield **17** as a colorless oil (0.10 g, 0.44 mmol, 66%). Our <sup>1</sup>H and <sup>13</sup>C NMR results are consistent with literature values [23].

# Results

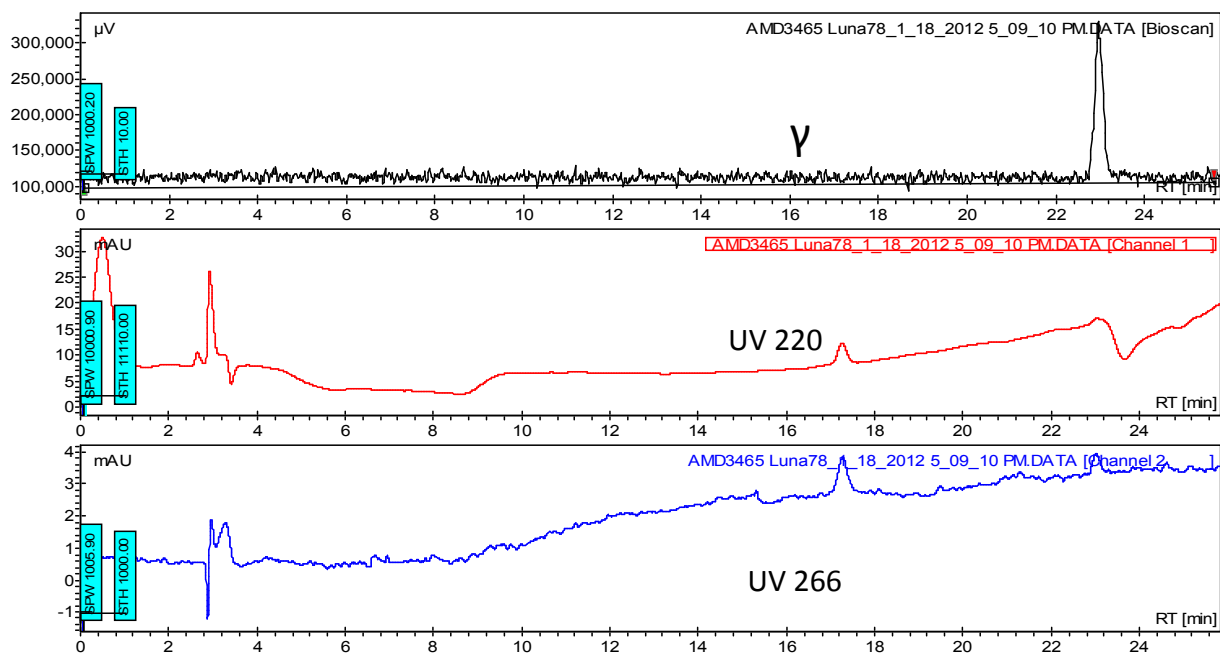

**Supp. Figure 1:** Radiochemical purity of pyrimidine [Cu-64]RAD1-24

Solvent A: Water+ 0.1% Trifluoroacetic acid  
 Solvent B: Methanol+ 0.1% Trifluoroacetic acid

| Time   | Flow rate(mL/min) | Mobile phase |
|--------|-------------------|--------------|
| Prerun | 5                 | A=90%, B=10% |
| 5      | 5                 | A=90%, B=10% |
| 30     | 5                 | A=50%, B=50% |
| 55     | 5                 | A=50%, B=50% |

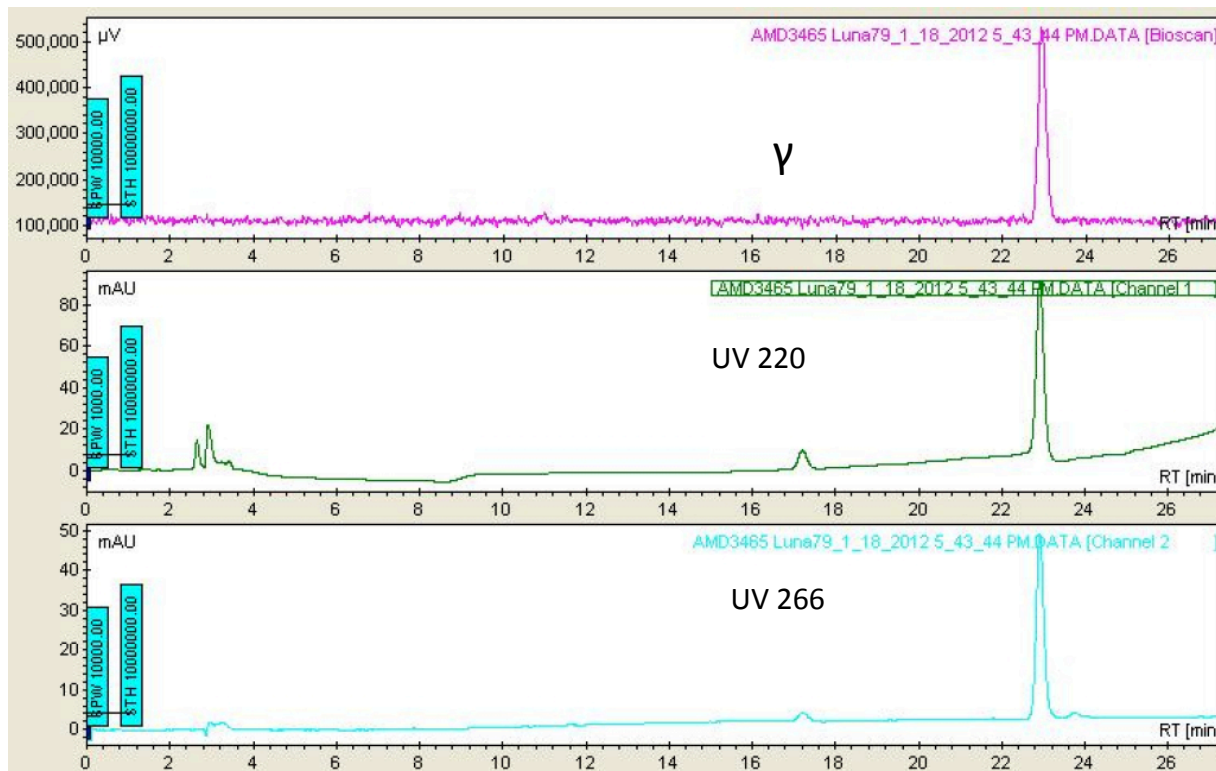

**Supp. Figure 2:** Co-injection of cold pyridine Cu(II)-RAD1-24 and [Cu-64]RAD1-24

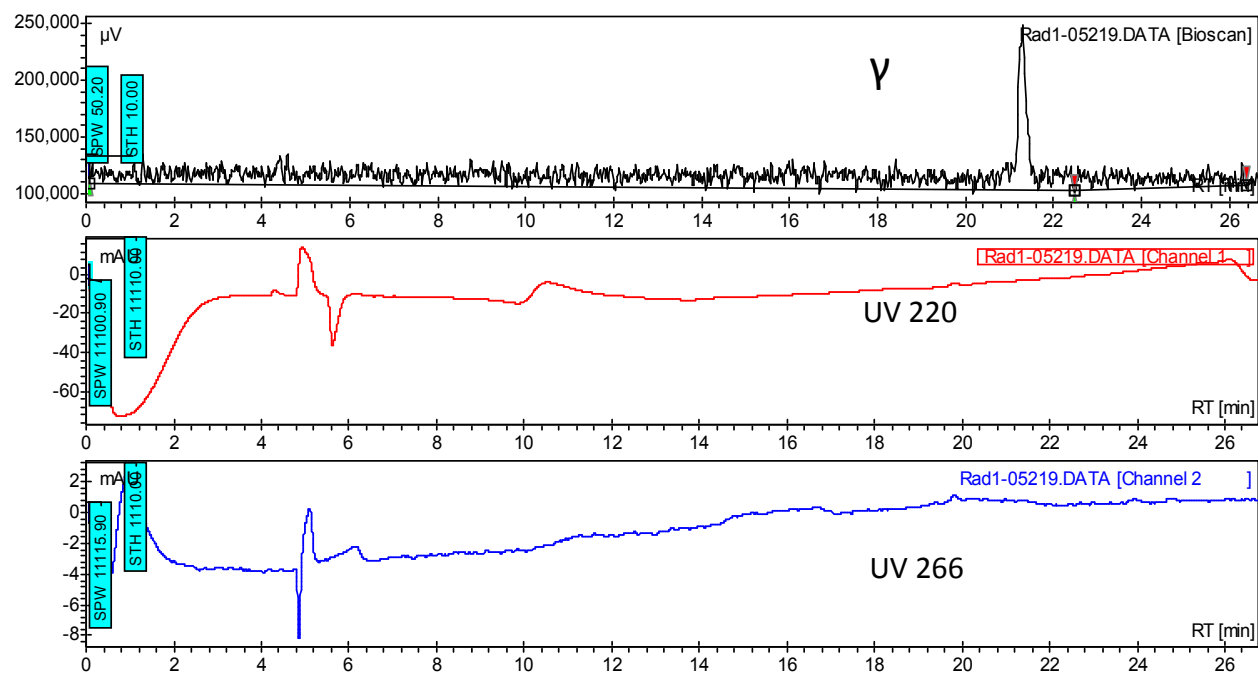

**Supp. Figure 3:** Radiochemical purity of pyrimidine [Cu-64]RAD1-52

Solvent A: Water+ 0.1% Trifluoroacetic acid  
 Solvent B: Methanol+ 0.1% Trifluoroacetic acid

| Time   | Flow rate(mL/min) | Mobile phase |
|--------|-------------------|--------------|
| Prerun | 3                 | A=95%, B=5%  |
| 0-5    | 3                 | A=95%, B=5%  |
| 10     | 5                 | A=85%, B=15% |
| 15     | 5                 | A=75%, B=25% |
| 55     | 5                 | A=10%, B=90% |



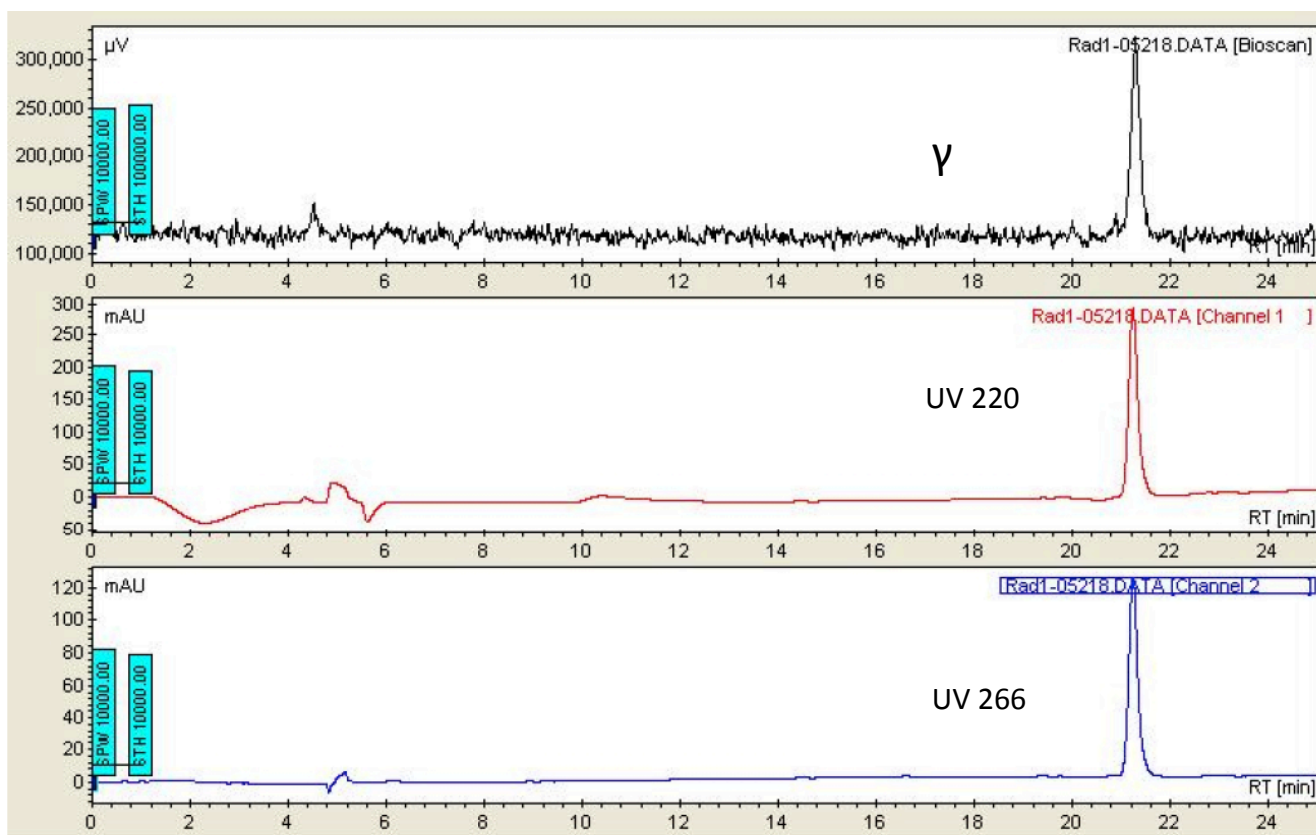

Supp. Figure 4: Co-injection of cold pyrimidine Cu(II)-RAD1-52 and [Cu-64]RAD1-52

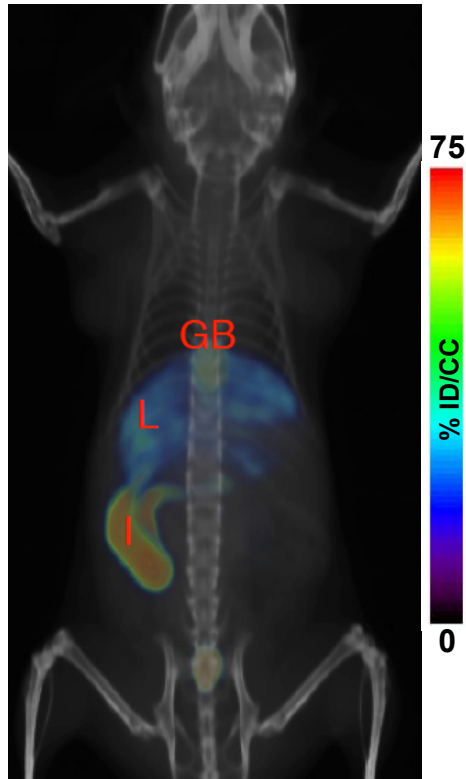

**Supp. Figure 5:** Whole body PET/CT scan at 90 minutes post-injection of  $\sim 250 \mu\text{Ci}$  of  $[\text{Cu-64}]\text{RAD1-39}$ ; GB, gallbladder; L, liver; I, intestines.
